# Supplementary material for: Public attitudes towards healthcare policies promoting tobacco cessation in Germany: results from the representative German study on tobacco use (DEBRA study)
Source: PubMed Central journal article supplement — BMJ Open. 2019 Aug 27;9(8):e026245. doi: 10.1136/bmjopen-2018-026245 (PMC6720139; doi:10.1136/bmjopen-2018-026245), 2019-08-27
Supplement: bmjopen-2018-026245supp001.pdf [file bmjopen-2018-026245supp001.pdf]

**Additional Table 1** Multivariable associations with support for the proposed healthcare policies in never- and ex-smokers (N = 1,476)

|                                   | <b>1) Every smoker gets cessation treatment for free</b> | <b>2) Training all healthcare professionals to advise smokers</b> | <b>3) Cessation support as standard care for smokers (physical diseases)</b> | <b>4) Cessation support as standard care for smokers (mental diseases)</b> |
|-----------------------------------|----------------------------------------------------------|-------------------------------------------------------------------|------------------------------------------------------------------------------|----------------------------------------------------------------------------|
| Age, 10-year units <sup>a</sup>   | 0.99 (0.93-1.05)                                         | 1.05 (0.99-1.12)                                                  | 1.08 (1.01-1.16)*                                                            | 1.04 (0.98-1.11)                                                           |
| Sex                               |                                                          |                                                                   |                                                                              |                                                                            |
| Female (ref.)                     | 1                                                        | 1                                                                 | 1                                                                            | 1                                                                          |
| Male                              | 0.90 (0.72-1.12)                                         | 0.90 (0.71-1.14)                                                  | 0.82 (0.64-1.05)                                                             | 0.97 (0.78-1.23)                                                           |
| Education <sup>†</sup>            |                                                          |                                                                   |                                                                              |                                                                            |
| High school equiv. (ref.)         | 1                                                        | 1                                                                 | 1                                                                            | 1                                                                          |
| Advanced technical college equiv. | 1.50 (0.95-2.36)                                         | 1.14 (0.70-1.83)                                                  | 1.08 (0.65-1.82)                                                             | 1.44 (0.89-2.32)                                                           |
| Secondary school equiv.           | 1.36 (1.01-1.83)*                                        | 1.44 (1.04-1.94)                                                  | 1.06 (0.76-1.48)                                                             | 1.07 (0.79-1.46)                                                           |
| Junior high school equiv.         | 1.42 (1.03-1.97)*                                        | 1.05 (0.75-1.49)                                                  | 0.86 (0.60-1.24)                                                             | 1.15 (0.82-1.61)                                                           |
| No qualification                  | 0.54 (0.19-1.58)                                         | 1.03 (0.34-3.08)                                                  | 0.68 (0.23-2.03)                                                             | 0.49 (0.17-1.38)                                                           |
| Household income                  |                                                          |                                                                   |                                                                              |                                                                            |
| €>5000/per month (ref.)           | 1                                                        | 1                                                                 | 1                                                                            | 1                                                                          |
| €4000-5000/per month              | 1.08 (0.62-1.91)                                         | 0.63 (0.34-1.16)                                                  | 1.46 (0.75-2.85)                                                             | 1.74 (0.95-3.16)                                                           |
| €3000-4000/per month              | 1.13 (0.70-1.80)                                         | 0.79 (0.47-1.31)                                                  | 1.14 (0.67-1.93)                                                             | 1.67 (1.03-2.72)*                                                          |
| €2000-3000/per month              | 1.03 (0.66-1.62)                                         | 0.76 (0.46-1.24)                                                  | 0.88 (0.53-1.46)                                                             | 1.42 (0.89-2.28)                                                           |
| €1000-2000/per month              | 1.00 (0.64-1.58)                                         | 0.82 (0.50-1.36)                                                  | 1.09 (0.65-1.82)                                                             | 1.70 (1.06-2.72)*                                                          |
| < €1,000/per month                | 1.62 (0.93-2.80)                                         | 1.16 (0.64-2.13)                                                  | 1.65 (0.87-3.12)                                                             | 2.09 (1.19-3.69)*                                                          |

Data are presented as adjusted OR (95% confidence interval around OR). Ref. = reference group. \*p<0.05; \*\*p<0.01; <sup>a</sup>continuous variable, <sup>†</sup>German equivalents to education levels listed in table from highest to lowest: high school equivalent = "Allgemeine Hochschulreife," advanced technical college equivalent = "Fachhochschulreife," secondary school equivalent = "Realschulabschluss," junior high school equivalent = "Hauptschulabschluss." Age units are based on DEBRA study participation eligibility (14 and older): 14-23; 24-33; 34-43; 44-53; 54-63; 64-73; 74-83; 84-93; 94-103.
